# Supplementary material
Source: Springer Nature journal article supplement (https://www.springermedizin.de/resource/supplementary/13054_2012_619_MOESM4_ESM.pdf/9708790)

a)

ONSD for detection of ICP>20mmHg  
ICP fluctuation >10mmHg

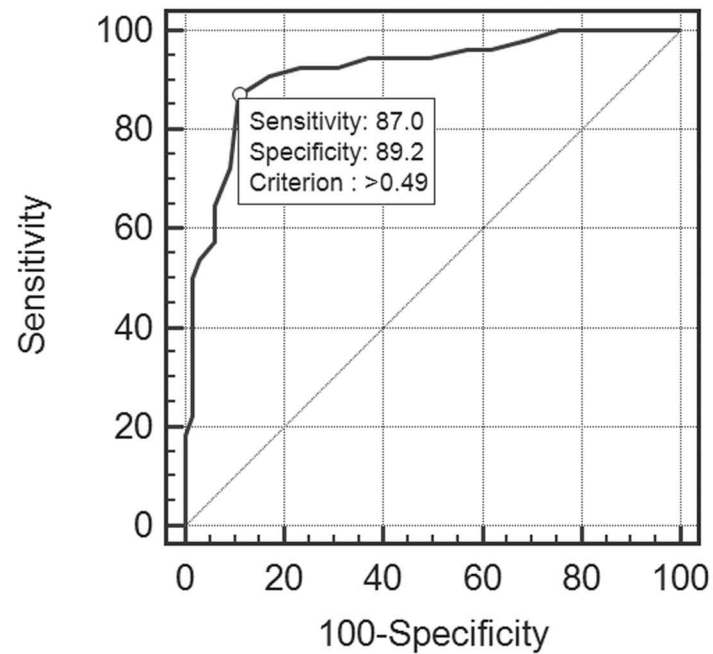

b)

ONSD for detection of ICP>20mmHg  
ICP fluctuity 5-10mmHg

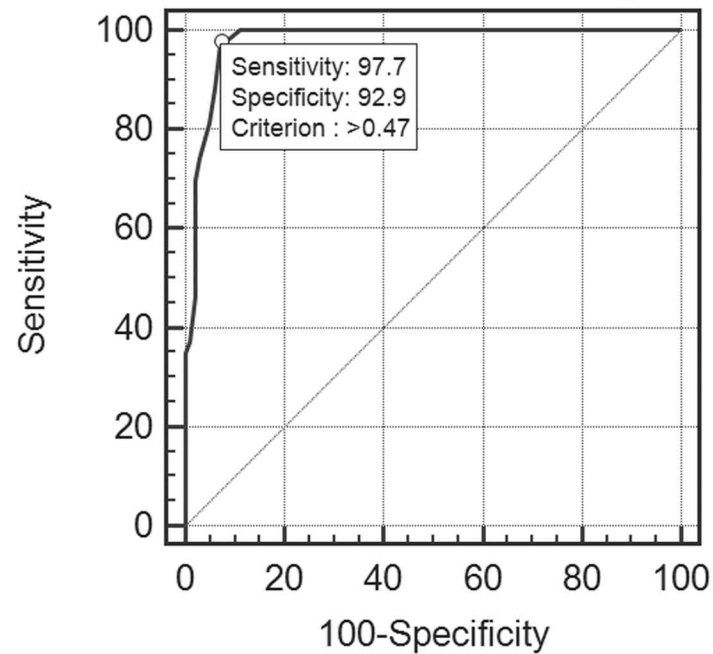

c)

ONSD for detection of ICP>20mmHg  
ICP fluctuation <5mmHg

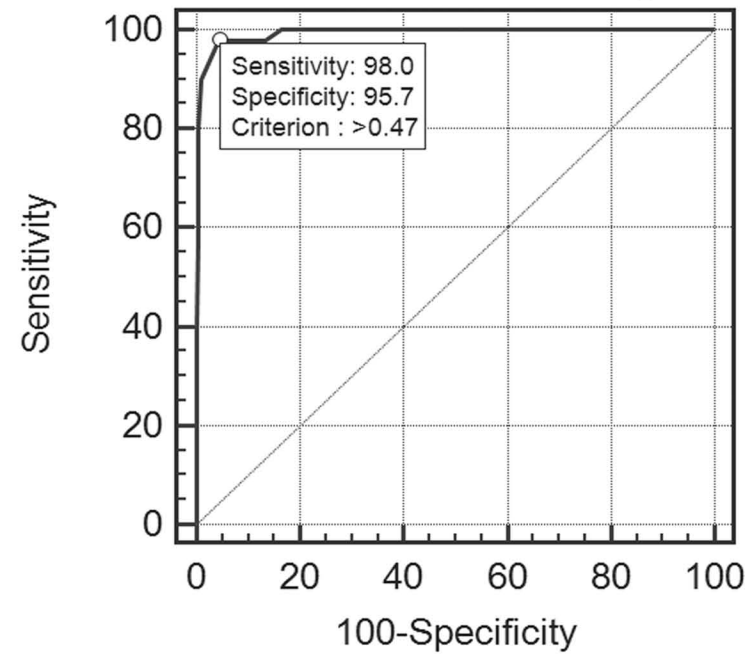

Supplement: MOESM4 [file 9708790]
